1 Experimental duration and predator satiation levels  
2 systematically affect functional response parameters

3 Yuanheng Li <sup>\*1,2,3</sup>, Björn C. Rall<sup>†1,2</sup>, and Gregor Kalinkat<sup>‡4</sup>

4 <sup>1</sup>German Centre for Integrative Biodiversity Research (iDiv)

5 Halle-Jena-Leipzig, Deutscher Platz 5e, 04103 Leipzig, Germany

6 <sup>2</sup>Institute of Ecology, Friedrich Schiller University Jena, Dornburger-Str.

7 159, 07743 Jena, Germany

8 <sup>3</sup>Johann-Friedrich-Blumenbach Institute of Zoology and Anthropology,  
9 Georg-August-Universität Göttingen, Berliner Str. 28, 37073 Göttingen,

10 Germany

11 <sup>4</sup>Department of Biology and Ecology of Fishes, Leibniz-Institute of  
12 Freshwater Ecology and Inland Fisheries, Müggelseedamm 310, 12587

13 Berlin, Germany

14 March 3, 2017

---

\*yuanheng.li@idiv.de; ORCID: <http://orcid.org/0000-0003-4071-8212>

†bjoern.rall@idiv.de; ORCID: <http://orcid.org/0000-0002-3191-8389>

‡kalinkat@igb-berlin.de; ORCID: <http://orcid.org/0000-0003-3529-5681>

16 **Abstract**

17 Empirical feeding studies where density-dependent consumption rates are fitted to  
18 functional response models are often used to parametrize the interaction strengths  
19 in models of population or food-web dynamics. However, the relationship between  
20 functional response parameter estimates from short-term feeding studies and real-  
21 world, long-term, trophic interaction strengths remains largely untested. In a crit-  
22 ical first step to address this void, we tested for systematic effects of experimental  
23 duration and predator satiation on the estimation of functional response parame-  
24 ters, namely attack rate and handling time. Analyzing a large data set covering a  
25 wide range of predator taxonomies and body sizes we show that attack rates de-  
26 crease with increasing experimental duration, and that handling times of starved  
27 predators are consistently shorter than those of satiated predators. Therefore, both  
28 the experimental duration and the predator satiation level have a strong and sys-  
29 tematic impact on the predictions of population dynamics and food-web stability.  
30 Our study highlights potential pitfalls at the intersection of empirical and theoret-  
31 ical applications of functional responses. We conclude our study with some practical  
32 suggestions how these implications should be addressed in the future to improve  
33 predictive abilities and realism in models of predator-prey interactions.

34 **Keywords:** Type II functional response — handling time — attack rate — experimental  
35 duration — predator satiation level — diurnal cycle — digestive limit

## 36 Introduction

37 Understanding species interactions and how they shape communities and ecosystems is  
38 a core topic in ecological research. Trophic interactions are fundamental for ecosystems,  
39 as they determine energy flow and nutrient cycling in ecological networks (Elton, 1927;  
40 Brown et al., 2004; Thompson et al., 2012). Moreover, interaction strengths play a crucial  
41 role in determining population dynamics and stability of food webs (May, 1972; Oaten  
42 and Murdoch, 1975; Oksanen et al., 1981; Rall et al., 2008; Brose, 2010; Kalinkat et al.,  
43 2013; Li et al., 2017). Functional response models which describe per capita feeding rates  
44 of consumers in dependence of resource densities (Solomon, 1949; Holling, 1959) provide  
45 a widely applied and standardized way to quantify these interaction strengths in food  
46 webs (Berlow et al., 2004; Kalinkat et al., 2013). Accordingly, interaction strengths are  
47 typically quantified by empirical studies, carried out mostly in the laboratory, from which  
48 feeding data is collected and used to fit a functional response model (Jeschke et al., 2002,  
49 2004; Rall et al., 2012). Parameters from these statistical models can then be used to  
50 parametrize the interaction strengths in theoretical food web models. Hence, functional  
51 response models often serve as the connection between studies of short-term, individual-  
52 level interactions and long-term, community-level studies (e.g. Kalinkat et al., 2013).  
53 However, most functional response studies only investigate feeding over a short portion  
54 of a species lifetime, from minutes (e.g. Schröder et al., 2016) to a few days (e.g. Buckel  
55 and Stoner, 2000), and the results are often applied to studies modeling interactions over  
56 many generations (e.g. hundreds of years; Fox and Murdoch, 1978). Whether functional  
57 response parameter values derived from short-term experiments hold for longer periods  
58 remains largely untested (but see Fox and Murdoch, 1978).

59 In a similar vein, the satiation levels of predators prior to feeding studies likely also  
60 modify functional response parameter estimates. As a predators' satiation level has direct

61 implications on its motivation to forage (Jeschke, 2007), satiated predators are expected  
62 to consume fewer prey individuals than starved predators which in turn would alter  
63 the functional response parameters. We addressed whether and how the experimental  
64 duration and the satiation level of predators affects the estimates of functional response  
65 parameters using a literature based functional response data base (Rall et al., 2012).

66 Due to the availability of data we focus our analysis on type II functional responses as  
67 described by Hollings Holling (1959) disc equation. This is the most widely-applied func-  
68 tional response model (Jeschke et al., 2002, 2004; Rall et al., 2012), where the per capita  
69 feeding rate,  $f(N)$ , is formulated as a function of prey density,  $N$  with two parameters,  
70 instantaneous rate of searching for prey,  $a$  (hereafter: attack rate) and handling time,  $h$ :

$$71 \quad f(N) = \frac{aN}{1 + ahN}. \quad (1)$$

72 In this model, Holling (1959) assumed that a predator spends its whole time budget on  
73 foraging, which includes activities such as searching, capturing, subduing, and ingesting  
74 the prey. The attack rate,  $a$ , describes the space (i.e. area or volume, depending on in-  
75 teraction type; Pawar et al., 2012; Barrios-O'Neill et al., 2016) that a predator searches  
76 per unit of time, representing the activity of ‘searching for prey’. The handling time,  $h$ ,  
77 associated with ‘processing the prey’, describes the average time that a predator spends  
78 on a caught prey item, i.e. subduing and ingesting. These two parameters also determine  
79 the shape of the functional response curve, where the attack rate determines the feeding  
80 rate at low prey densities and the handling time determines the maximum feeding rate  
81 (Fig. 1).

82 Attack rates and handling times indirectly derived through fitting statistical functional  
83 response models to feeding data often do not resemble the attack rates and handling times

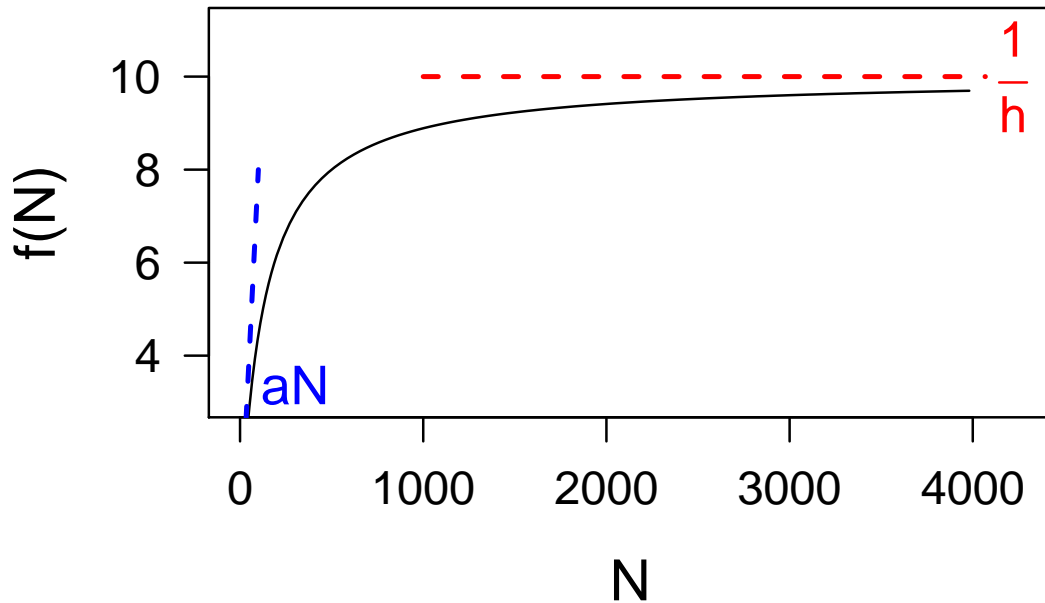

Figure 1: Schematic curve of type II functional response. The red dashed line denotes the inverse of handling time,  $\frac{1}{h}$  which sets the limit of maximum feeding rate. The blue dash line denotes the tangent line of the curve at the minimal prey density,  $N$  which describes the potential increase of feeding with prey density around low prey densities. This potential increase around low prey densities is determined by the attack rate,  $a$ .

84 derived by direct observation (Mols et al., 2004; Jeschke and Tollrian, 2005; Sentis et al.,  
85 2013; but see Tully et al., 2005). As there are more activities than ‘searching for prey’  
86 and ‘subduing the prey’ in the life histories or even diurnal cycles of predators (e.g. active  
87 and resting periods), a plethora of biological (i.e. physiological and behavioral) processes  
88 are collapsed into the attack rate and the handling time (Jeschke et al., 2002; Jeschke  
89 and Tollrian, 2005; Casas and McCauley, 2012). Even in a predator’s activity period it  
90 may not spend the whole time on foraging. For example, grazing ruminants feed in a  
91 discrete fashion rather than continuous grazing, i.e. they switch between grazing and  
92 resting (Gregorini et al., 2006). As Holling’s (1959) disc equation does not have any  
93 term accounting for other activities, e.g. rest or sleeping, handling times and attack  
94 rates have to incorporate those time budgets in cases where these other activities apply.  
95 Parameter estimates in a long-term experiment are therefore much more likely to embody

96 non-foraging behaviours than estimates derived from a short-term experiment using the  
97 same predator-prey pair. Specifically, the feeding rates derived from the long-term study  
98 would be lower than those from the short-term study. Lower feeding rates will likely  
99 affect functional response parameter estimation, decreasing the attack rate and increasing  
100 handling time estimates (Fig. 2a and 2b). Mathematically, the feeding rate,  $f(N)$  is  
101 negatively related to the handling time,  $h$  (Fig. 1) and the increased handling times in  
102 long-term experiments (where feeding rate should be lower) is expected for this reason. As  
103 the attack rate accounts for the average successful search rate for the entire experimental  
104 duration, increasing experimental duration which generally includes more time for other  
105 activities than foraging, would lead to reduced attack rates (Casas and McCauley, 2012).

106 Foraging motivation is also expected to be influenced by predator satiation (Jeschke,  
107 2007). In extreme cases, a predator with a fully-filled gut will be unable to feed even  
108 with infinite food supply, a well-known phenomenon called ‘digestive limit’ (Kleiber,  
109 1961; Herbers, 1981). It supposes that consumers are able to fill-up their guts and meet  
110 their energy requests rather easily, e.g. on a daily-base (Jeschke, 2007). Thereafter, the  
111 (maximum) feeding rates and herewith handling times are also limited by gut sizes and  
112 digestion rates (Jeschke et al., 2002, 2006). ‘Digestive limits’ have been demonstrated  
113 in a range of vertebrate species but only few invertebrates (Karasov and McWilliams,  
114 2005; Jeschke and Tollrian, 2005; Jeschke, 2007). Under the assumption that digestive  
115 limits are a rather general mechanism holding for most consumers, the satiation level of  
116 a predator before a feeding study will influence the estimate of handling time (Anderson  
117 et al., 1978; Jeschke et al., 2002; Jeschke, 2007). Testing pre-fed predators in feeding  
118 trials would then lead to longer handling times compared to testing starved ones. The  
119 time budgets of the handling time of a satiated predator would involve not only the time  
120 for killing ( $t_{kill}$ ) and ingesting ( $t_{ing}$ ), but also the time for digestion ( $t_{dig}$ ) (see Fig. 2c.)

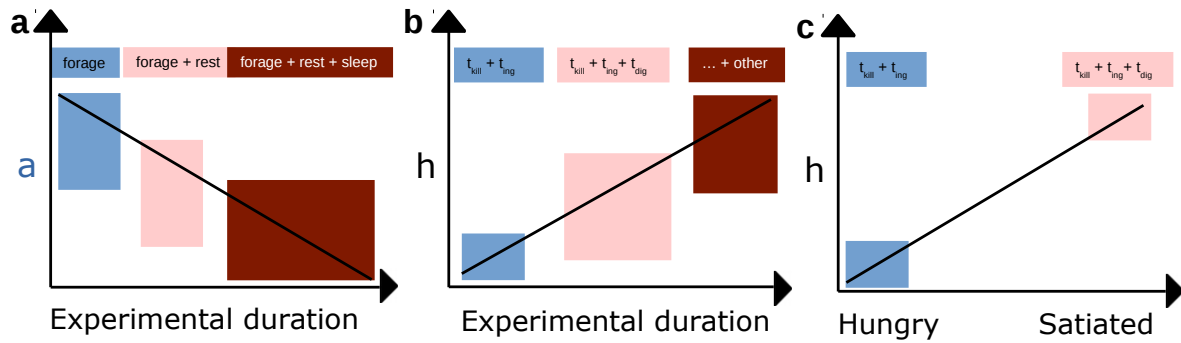

Figure 2: The potential effects of experimental duration (panel **a** and **b**) and satiation level of the predator (panel **c**) on functional response parameter estimates. We hypothesized that increasing experimental duration would lead to decreasing attack rates,  $a$  (panel **a**). Elongated experiments may lead to increased handling times ( $h$ ) (panel **b**). We also hypothesized that a satiated (pre-fed) predator shall result in longer handling times ( $h$ ) than hungry (starved) predators (panel **c**).

121 As the experimental duration elongates, the probability to reach satiation would in-  
122 crease systematically for every efficiently foraging predator. Thereafter, if the experimen-  
123 tal duration is long enough and prey is sufficient, the predator can reach satiation and  
124 face its digestive limit. In this case, the handling time could be influenced by including  
125 the time budget for digestion. As the experimental duration further elongates, other ac-  
126 tivities of the predator (e.g. sleep) could be involved. In this case, elongated experimen-  
127 tal duration can additionally increase handling time by incorporating a growing proportion  
128 of non-feeding activities.

129 For this study, we used a data set from Rall and colleagues (2012) and updated it  
130 with information on starvation and experimental time. We focused on type II functional  
131 responses leaving 451 distinct data points from 61 peer-reviewed publications. The data  
132 mostly consists of controlled laboratory experiments (99%) with arthropods (78%) and  
133 vertebrates (17%) as predators. Prior to our analyses we hypothesized that, 1) exper-  
134 imental duration has systematic effects on functional response parameters, particularly  
135 on the attack rate, and that, 2) the influence of predator satiation on handling time holds

136 over a wide range of different taxonomies, body sizes, and dimensionality of consumer  
137 search space. As elaborated above, we assume that in general, satiated predators should  
138 consume fewer prey than hungry ones on the premise that all other conditions are the  
139 same. Therefore, 3) the handling time of satiated predators should be longer than that of  
140 hungry ones as it should incorporate additional time budgets for digestion and activities  
141 unrelated to foraging.

## 142 **Methods**

### 143 **Data and statistical analysis**

144 We analyzed a data set of published functional responses from empirical studies (Rall  
145 et al., 2012). To be included in our analyses studies needed to report experimental  
146 duration, consumer and resource body sizes, as well as experimental temperatures, as  
147 these are main drivers for functional response parameter estimates (Rall et al., 2010, 2012;  
148 Kalinkat et al., 2013; Kalinkat and Rall, 2015). Additionally, we checked and included  
149 information on the satiation levels of predators. The predator satiation is represented by  
150 “feeding-or-not” prior to the studies, i.e. ‘fed’ for the predators which were fed before the  
151 feeding trials and ‘starved’ for the predators which were isolated from food source before  
152 the feeding trials.

153 In order to assemble the data set we excluded functional responses derived from exper-  
154 iments which 1) lacked information on experimental duration or predator satiation levels,  
155 2) were not type-II functional responses and 3) excluded ones that are for parasitoids (not  
156 suitable for testing predator satiation). The final data set consisted of 451 functional re-  
157 sponses from 61 studies (see the full bibliography in Appendix I). It spans 14 orders of



158 magnitude of predator body-mass and covers predator species from 28 taxonomic orders  
159 (see Appendix I). It includes 338 and 113 functional responses for starved and fed preda-  
160 tors, respectively, and it includes data on experimental duration ranging from 0.08 h to  
161 240 h in which 67.6 % are exactly 24 h. It also includes functional responses for studies  
162 performed in two- and three-dimensional spaces, in which 243 were 2D interactions and  
163 208 were 3D interactions. We took care of dimensionality as the units of attack rates are  
164 different in two- and three-dimensional spaces (i.e.  $[\text{m}^2 \text{s}^{-1}]$  and  $[\text{m}^3 \text{s}^{-1}]$ ) which might  
165 also cause varying scaling relationships (Pawar et al., 2012; Barrios-O'Neill et al., 2016).

166 In the following steps, we analyzed the functional response parameters attack rate,  $a$   
167  $[\text{m}^2 \text{s}^{-1} | \text{m}^3 \text{s}^{-1}]$ , and handling time,  $h$  [s] in relation to experimental duration,  $t_e$  [s] and  
168 predator satiation,  $S$  (starved,  $S_y$  or fed,  $S_n$ ). To account for strong effects of predator  
169 body mass, temperature and dimensionality we also added these as explanatory variables  
170 (Rall et al., 2012; Pawar et al., 2012). The following equations demonstrate how we an-  
171 alyzed the attack rate and handling time:

$$a_2 = a_{0_{2S}} M^{b_{2S}} e^{E_{a_{2S}} \frac{T-T_0}{kT T_0}} t_e^{i_{2S}}, \quad (2a)$$

172

$$a_3 = a_{0_{3S}} M^{b_{3S}} e^{E_{a_{3S}} \frac{T-T_0}{kT T_0}} t_e^{i_{3S}}, \quad (2b)$$

$$h = h_{0_S} M^{c_S} e^{E_{h_S} \frac{T-T_0}{kT T_0}} t_e^{j_S}. \quad (2c)$$

173 In equations 2a-c,  $a_0$  and  $h_0$  are constants,  $b$  and  $c$  are the scaling exponents for predator  
174 body mass,  $M$  [mg],  $E_a$  and  $E_h$  [eV] are activation energies describing the exponents  
175 of temperature and  $i$  and  $j$  represent the scaling exponents of attack rate and handling  
176 time for experimental duration. The temperature term is transformed using Boltzmann's  
177 constant,  $k$  [eV K<sup>-1</sup>], and the intercepts of temperature scalings are shifted to the values  
178 at 293.15 K (20 °C) by the normalization temperature,  $T_0$  (for more details see Gillooly

179 et al., 2001; Rall et al., 2012). The subscript,  $S$ , represents the predator satiation which  
180 can either become ‘starved’ ( $S_y$ ) or ‘fed’ ( $S_n$ ). The subscripts  $_2$  and  $_3$  in the attack rate  
181 models, eq. (2a), (2b) denote the dimensionality (2D or 3D). We tested the collinear-  
182 ity between independent variables (Zuur et al., 2010). A variance inflation factor test  
183 showed that there was no collinearity between any independent variables (for details see  
184 Appendix II). We analyzed the data with linear mixed-effects models (‘lme’ function in  
185 ‘nlme’ package in R; Pinheiro et al., 2016; R Core Team, 2016) by ln-transforming:

$$\ln(a_2) = \ln(a_{0_2S}) + b_{2S} \ln(M) + E_{a_{2S}} \frac{T - T_0}{k T T_0} + i_{2S} \ln(t_e) \quad (3a)$$

186

$$\ln(a_3) = \ln(a_{0_3S}) + b_{3S} \ln(M) + E_{a_{3S}} \frac{T - T_0}{k T T_0} + i_{3S} \ln(t_e) \quad (3b)$$

$$\ln(h) = \ln(h_{0_S}) + c_S \ln(M) + E_{h_S} \frac{T - T_0}{k T T_0} + j_S \ln(t_e) \quad (3c)$$

187 We first used Bayesian Information Criterion (BIC; Zuur et al., 2009, p. 121) to select  
188 the optimal random structures of the models which were fitted according to restricted  
189 maximum likelihood (‘REML’ Pinheiro et al., 2016). We included all pairwise interac-  
190 tions of the fixed effects while selecting the optimal random effects structure for both  
191 attack rate and handling time models. (for details see Zuur et al., 2009). After selecting  
192 the optimal random effects structure, the BIC values for attack rate and handling time  
193 models were computed using the ‘dredge’ function in the “MuMIn” package in R (Bartoń,  
194 2016). Optimal models were then selected according to the lowest BIC value following  
195 Raftery (1995). Accordingly,  $\Delta\text{BIC}$  for each second best fitting model should be at least  
196  $>2$  ( $\Delta\text{BIC}=\text{BIC} - \min(\text{BIC})$ ).

## 197 Results

198 We first selected the appropriate models based on their  $\Delta\text{BIC}$  for both, attack rate  
 199 ( $\Delta\text{BIC}$  for second best model=15.89) and handling time ( $\Delta\text{BIC}$ =7.98). The selected  
 200 model for attack rate included predator body mass, temperature, experimental duration  
 201 and dimensionality. The selected model for handling time included predator body mass,  
 202 temperature and predator satiation (Tab. 1). The attack rate scaled negatively with  
 203 experimental duration but not with predator satiation level. The model for attack rate  
 204 included the influence of dimensionality on its intercepts (panel A, B and C of Fig. 3). The  
 205 model of handling time included the effect of predator satiation level, but experimental  
 206 duration is excluded from the model. Predator satiation level did not interact with  
 207 other independent variables, resulting in different constants for starved and fed predators,  
 208 respectively (panel D and E of Fig. 3).

Table 1: Statistical results for attack rate and handling time. All interaction terms have been excluded by model selection (see Methods for details).

|               | Variable <sup>a</sup> |               | Estimate | S.E. | p-value |
|---------------|-----------------------|---------------|----------|------|---------|
| attack rate   | dimension             | $a_{0_{2D}}$  | 0.78     | 1.96 | > 0.1   |
|               |                       | $a_{0_{3D}}$  | -1.28    | 1.9  | > 0.1   |
|               | predator mass         | $b$           | 0.49     | 0.08 | < 0.01  |
|               | temperature           | $E_a$         | 0.43     | 0.06 | < 0.01  |
|               | experimental duration | $i$           | -0.56    | 0.18 | < 0.01  |
|               | predator satiation    | excluded      |          |      |         |
| handling time | predator satiation    | $h_{0_{S_y}}$ | -0.73    | 0.44 | > 0.1   |
|               |                       | $h_{0_{S_n}}$ | 1.64     | 0.73 | < 0.05  |
|               | predator mass         | $c$           | -0.73    | 0.05 | < 0.01  |
|               | temperature           | $E_h$         | -0.30    | 0.10 | < 0.01  |
|               | experimental duration | excluded      |          |      |         |

<sup>a</sup>see Eq. (3)

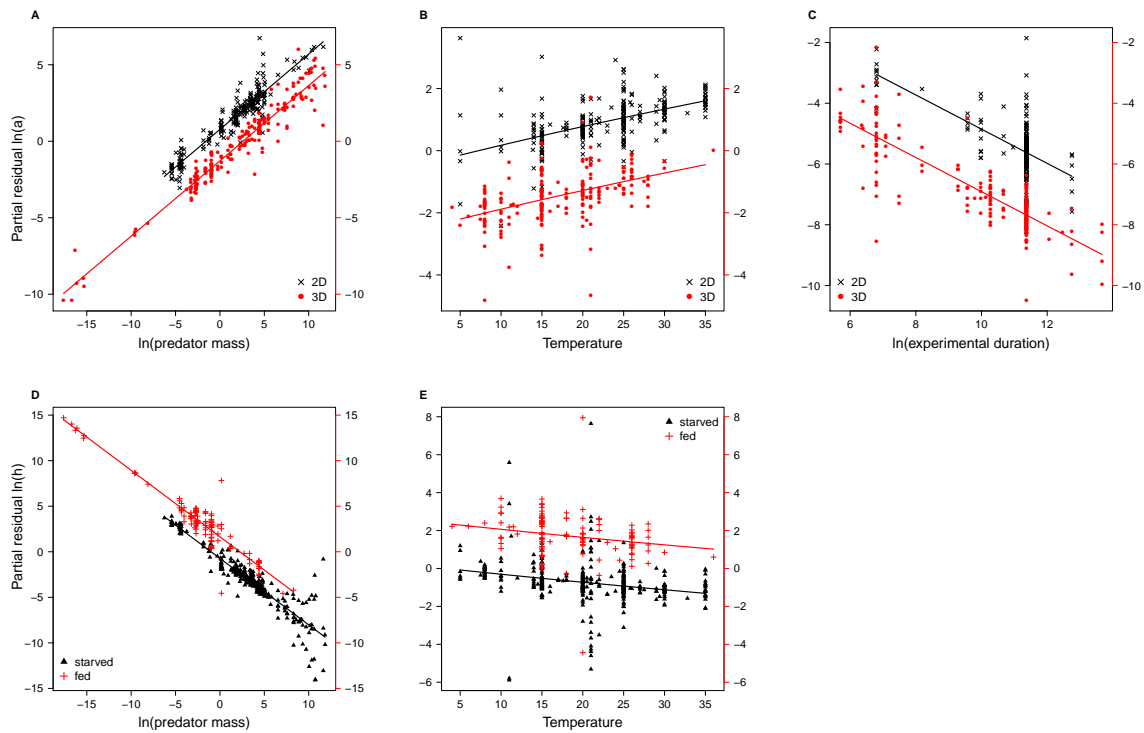

Figure 3: Dependencies of attack rate and handling time. Partial residuals are plotted on the y-axes and all variables other than temperature were ln-transformed. (For details on the derivation of partial residuals see Appendix II). The attack rate ( $a$ ) increases with predator body mass [mg] (panel A), temperature [ $^{\circ}$ C] (panel B), and decreases with experimental duration [s] (panel C; see legends and Tab. 1). Handling time ( $h$ ) decreases with predator body mass (panels D) and temperature (panels E), while handling times for fed predators are longer than those for starved predators (see legends and Tab. 1).

## 209 Discussion

210 Here we used a large data set of empirical functional responses to investigate if the exper-  
211 imental duration and satiation level of predators have systematic effects on the estimates  
212 of functional response parameters. We included studies where feeding data were fitted  
213 to the most widely-spread ‘type II functional response’ model. Notably, the resulting  
214 data set contains predator-prey pairs from a wide variety of ecosystem types including  
215 the marine, freshwater and terrestrial realm, as well as a wide range of taxonomies, from  
216 protists to vertebrates. Our results demonstrate that attack rates estimates decrease with  
217 increasing experimental duration and that the handling times of satiated predators are  
218 longer than those of hungry predators. Thus, two of our hypotheses were supported by  
219 our findings (Fig. 2a, c), whereas our hypothesis that increasing experimental duration  
220 increases handling time was not supported (Fig. 2b).

221 Our analyses of attack rates illustrated the influence of predator body mass, temper-  
222 ature and experimental duration. While the results of the effects of predator body mass  
223 and temperature on attack rates are consistent with previous studies (Rall et al., 2012;  
224 Fussmann et al., 2014) we show here that there is a general effect of experimental duration  
225 on the estimates of attack rates that holds across a wide range of taxonomies and body  
226 sizes. The finding that attack rate decreases with experimental duration is intuitive to  
227 understand and can be attributed to biological mechanisms (Jeschke et al., 2002; Jeschke,  
228 2007). Longer experimental durations will automatically involve a higher proportion of  
229 non-feeding activities in foraging experiments. Within a diurnal cycle (24 hour period),  
230 the majority of ‘other activities’ consists of resting and sleeping for most animals (Camp-  
231 bell and Tobler, 1984). Therefore, assuming all other conditions are kept constant (e.g.  
232 identical predator-prey pair with constant size ratios, identical and standardized satia-  
233 tion levels of the predators), the attack rate estimates derived from a feeding study of 24

234 hours will be smaller than those obtained through a short-term experiment that includes  
235 only the high-activity window out of the diurnal cycle of a given predator (Casas and  
236 McCauley, 2012). Despite the suggestion that gut sizes of some predators can be some-  
237 what phenotypically plastic (over periods of weeks or months; Karasov and McWilliams,  
238 2005; Van Gils et al., 2005), 96 % of the data used in this study are from experiments  
239 within 24 hours and therefore our findings on the effects of experimental duration are not  
240 confounded by changes in gut capacity (Fig. 2a).

241 Moreover, there are a few empirical case studies also supporting our findings relating  
242 to the effects of experimental duration. For instance, Fox and Murdoch (1978) tested  
243 how functional responses of a predatory water bugs (*Notonecta hoffmanni*) vary between  
244 short-term (3 hours) and long- term (12 hours) experiments (Fox and Murdoch, 1978).  
245 Even though Fox and Murdoch (1978) did not perform a statistical analysis to compare  
246 the estimates of functional response parameters between short- and long-term experi-  
247 ments, the estimated values for attack rates are consistent with our results. Another  
248 recent modeling study confirmed this effect of experimental duration on the estimates  
249 of attack rates and explicitly highlighted that the inclusion of different activities during  
250 diurnal cycles may bias attack rate estimation (Casas and McCauley, 2012). Our results  
251 indicate that these findings of Casas and McCauley (2012) are likely generalizable to most  
252 predator-prey pairs. For future studies, it would also be important to address how longer  
253 feeding trials, over several weeks or even months, will affect the estimation of interaction  
254 strengths (Buckel and Stoner, 2000).

255 Our statistical results documented systematic influence of predator body mass, tem-  
256 perature and predator satiation levels on handling times. Notably, experimental duration  
257 had no effect on handling times. This might be explained by the fact that the experimental  
258 exploration of functional responses is often limited by the availability of high prey densi-

ties which renders excessive replication at very high prey densities logistically impractical  
and therefore rather unlikely (also see Jeschke et al., 2006). Therefore scenarios where the  
digestion limit is reached at an early stage within any experiment are rare. With a data set  
that includes both invertebrate and vertebrate predators, we showed that the estimates  
of handling times for starved predators were lower than those for the fed ones. Previous  
studies suggested the influence of satiation level on handling times mostly for vertebrate  
predators (Karasov and McWilliams, 2005; Jeschke and Tollrian, 2005; Jeschke, 2007).  
Particularly, Anderson et al. (1978) is one of few experimental studies which explicitly  
tested how predator satiation level affects the functional response. There, the authors  
demonstrated that zebra fish (*Danio rerio*) showed considerably higher maximum feeding  
rates when they were starved for 24 hours before the experiment compared to satiated  
fish fed one hour before the trial (Anderson et al., 1978). Here we generalized this find-  
ing to invertebrates, as the majority 78% of the data we analyzed are from arthropod  
predators. This supports the theoretical assumption that generally, both vertebrate and  
invertebrate predators may face digestion limits (see also Jeschke et al., 2002; Jeschke,  
2007). In one of the rare experimental studies addressing this issue for invertebrates,  
however, Maselou et al. (2015) found for a predatory mirid bug (*Macrolophus pygmaeus*)  
that the estimates of functional response parameters were not affected by predator sati-  
ation. This might be due the specific design where four different treatments of gradually  
differing starvation levels were tested, while a treatment including fully satiated predators  
was missing. Moreover, all four functional response curves in this study did not seem to  
reach full satiation (Maselou et al., 2015). The comparison between satiated and starved  
predators seems to be important for addressing the effects of predator satiation level on  
functional response parameter estimates. Another study investigated the influence of  
predator satiation with data of predatory fish (largemouth bass, *Micropterus salmoides*;

284 Essington et al., 2000). In agreement with our finding, the authors state that feeding  
285 rates are reduced by predator satiation (Essington et al., 2000). To better address this  
286 issue in future studies, Essington et al. (2000) suggested to separate the effect of predator  
287 satiation to act on two temporal scales: 1) instantaneous satiation occurs when feeding  
288 rate exceeds gut capacity (constraint of gut size) and 2) integrated satiation occurs when  
289 feeding rate exceeds the time required to digest prey (constraint of digestion rate) which  
290 is in line with suggestions by Jeschke and colleagues (2002; 2006). The higher handling  
291 times associated with satiated predators may mostly reflect the constraint of digestion  
292 rate, and the comparably lower handling times of starved predators may be caused by a  
293 lack of constraint from gut size.

294 Empirical studies that aim to quantify interaction strengths are time-consuming and often  
295 need extensive replication to investigate how particular effects drive attack rates, han-  
296 dling times, and other parameters in more complex functional response models (Kalinkat  
297 et al., 2013; Barrios-O'Neill et al., 2016). Achieving high replication of long-term exper-  
298 iments that are close to natural conditions will most often be logistically infeasible. To  
299 that end our study demonstrates that short-term functional response studies will most  
300 likely lead to overestimated interaction strengths in models of predator-prey dynamics or  
301 food webs. However, our results also expose that this bias can be explained by plausible  
302 biological mechanisms. Understanding these mechanism and incorporating them when  
303 scaling up from local, short-term, studies to population, community or even ecosystem-  
304 level effects holds much promise for a better understanding how species interactions shape  
305 communities and ecosystems.



## 306 Conclusion

307 In the present study, we addressed the systematic effects of two common issues in feed-  
308 ing studies, i.e. how experimental duration and satiation levels of predators affect the  
309 parameter estimates in widely applied statistical functional response models. Our study  
310 indicates clear and intuitive biological mechanisms affecting the functional response pa-  
311 rameters. When models parametrized accordingly are scaled up, these effects will likely  
312 modify the estimates of the dynamics and stability of populations, food webs, ecosys-  
313 tems, and, ultimately, biodiversity. Theoretically, both – higher attack rates and shorter  
314 handling times – will strengthen the feeding interactions in population and food-web  
315 models. Increasing interaction strengths will generally lead to stronger top-down pres-  
316 sure where stronger predator-prey interactions drive food webs into unstable conditions  
317 (Rall et al., 2008). Moreover, for predator-prey systems characterized by cycling dynam-  
318 ics, such strengthening will lead to collapse and the extinction of predator species (Rip  
319 and McCann, 2011). This has important implications when realistic predictions to be  
320 applied on food-web dynamics are sought. Hence both, empiricists who conduct feeding  
321 studies to estimate functional response parameters, and theoreticians who try to analyze  
322 the dynamics and stability of food webs often parametrized with such empirically-derived  
323 parameters should critically take into account these effects. Eventually, this will enable  
324 more realistic predictions of population and food-web dynamics which are crucial for un-  
325 derstanding the consequences of biodiversity loss (Brose et al., 2016) and will help to  
326 bridge lingering gaps between theoretical and empirical ecological research (Jeltsch et al.,  
327 2013)

## 328 **Acknowledgements**

329 We are grateful to Jonathan Jeschke and Christopher Monk for their valuable comments  
330 and suggestions that helped to improve this manuscript. We further thank Vicky Tröger  
331 for her assistance in revising and updating the data set.

## 332 **Funding**

333 Funding to Y.L. was provided by the German Science Foundation (DFG) via the research  
334 group "FOR 1748 - Networks on Networks". Y.L. and B.C.R. gratefully acknowledge  
335 support by the German Centre for Integrative Biodiversity Research (iDiv) Halle-Jena-  
336 Leipzig funded by the DFG (FZT 118). G.K. was also supported by DFG (KA 3029/2-1).  
337 The funding sources had no role in study design, data collection and analysis, decision  
338 to publish, or preparation of the manuscript.

## 339 **Conflict of interest statement**

340 The authors declare no conflict of interest.

## 341 **Author contribution statement**

342 G.K. and B.C.R. designed the study; Y.L. analyzed the data in the light of discussion  
343 with B.C.R. and G.K.; Y.L. wrote the manuscript with substantial further contributions  
344 by B.C.R. and G.K.

## 345 **Data accessibility statement**

346 All data will be made available as supporting information should the manuscript be  
347 accepted. R-Code for analysis will be available from the authors on request.

## 348 **References**

349 Anderson, R. M., Whitfield, P. J., Dobson, A. P., and Keymer, A. E. (1978). Concomitant  
350 predation and infection processes: an experimental study. *Journal of Animal Ecology*,  
351 47(3):891–911.

352 Barrios-O’Neill, D., Kelly, R., Dick, J. T. A., Ricciardi, A., MacIsaac, H. J., and Em-  
353 merson, M. C. (2016). On the context-dependent scaling of consumer feeding rates.  
354 *Ecology Letters*, 19(6):668–678.

355 Bartoń, K. (2016). *MuMIn: Multi-Model Inference*. R package version 1.15.6.

356 Berlow, E. L., Neutel, A.-M., Cohen, J. E., de Ruiter, P. C., Ebenman, B., Emmerson,  
357 M., Fox, J. W., Jansen, V. A. A., Iwan Jones, J., Kokkoris, G. D., Logofet, D. O.,  
358 McKane, A. J., Montoya, J. M., and Petchey, O. (2004). Interaction strengths in food  
359 webs: issues and opportunities. *Journal of Animal Ecology*, 73(3):585–598.

360 Brose, U. (2010). Body-mass constraints on foraging behaviour determine population  
361 and food-web dynamics. *Functional Ecology*, 24(1):28–34.

362 Brose, U., Blanchard, J. L., Eklöf, A., Galiana, N., Hartvig, M., R. Hirt, M., Kalinkat,  
363 G., Nordström, M. C., O’Gorman, E. J., Rall, B. C., Schneider, F. D., Thébault, E.,  
364 and Jacob, U. (2016). Predicting the consequences of species loss using size-structured  
365 biodiversity approaches. *Biological Reviews*, pages 1–14. DOI:10.1111/brv.12250.

- 366 Brown, J. H., Gillooly, J. F., Allen, A. P., Savage, V. M., and West, G. B. (2004). Toward  
367 a metabolic theory of ecology. *Ecology*, 85(7):1771–1789.
- 368 Buckel, J. A. and Stoner, A. W. (2000). Functional response and switching behavior of  
369 young-of-the-year piscivorous bluefish. *Journal of Experimental Marine Biology and*  
370 *Ecology*, 245(1):25–41.
- 371 Campbell, S. S. and Tobler, I. (1984). Animal sleep: A review of sleep duration across  
372 phylogeny. *Neuroscience & Biobehavioral Reviews*, 8(3):269–300.
- 373 Casas, J. and McCauley, E. (2012). Daily foraging cycles create overlapping time-scales  
374 in functional responses. *Oikos*, 121(12):1966–1976.
- 375 Elton, C. S. (1927). *Animal Ecology*. New York, Macmillan Co.
- 376 Essington, T. E., Hodgson, J. R., and Kitchell, J. F. (2000). Role of satiation in the  
377 functional response of a piscivore, largemouth bass (*Micropterus salmoides*). *Canadian*  
378 *Journal of Fisheries and Aquatic Sciences*, 57(3):548–556.
- 379 Fox, L. R. and Murdoch, W. W. (1978). Effects of feeding history on short-term and  
380 long-term functional responses in *Notonecta hoffmanni*. *Journal of Animal Ecology*,  
381 47(3):945–959.
- 382 Fussmann, K. E., Schwarzmüller, F., Brose, U., Jousset, A., and Rall, B. C. (2014).  
383 Ecological stability in response to warming. *Nature Climate Change*, 4(3):206–210.
- 384 Gillooly, J. F., Brown, J. H., West, G. B., Savage, V. M., and Charnov, E. L. (2001).  
385 Effects of size and temperature on metabolic rate. *Science*, 293(5538):2248–2251.
- 386 Gregorini, P., Tamminga, S., and Gunter, S. A. (2006). Behavior and Daily Grazing  
387 Patterns of Cattle. *The Professional Animal Scientist*, 22(3):201–209.

- 388 Herbers, J. M. (1981). Time resources and laziness in animals. *Oecologia*, 49(2):252–262.
- 389 Holling, C. S. (1959). Some characteristics of simple types of predation and parasitism.  
390 *The Canadian Entomologist*, 91(7):385–398.
- 391 Jeltsch, F., Blaum, N., Brose, U., Chipperfield, J. D., Clough, Y., Farwig, N., Geissler,  
392 K., Graham, C. H., Grimm, V., Hickler, T., Huth, A., May, F., Meyer, K. M., Pagel,  
393 J., Reineking, B., Rillig, M. C., Shea, K., Schurr, F. M., Schröder, B., Tielbörger, K.,  
394 Weiss, L., Wiegand, K., Wiegand, T., Wirth, C., and Zurell, D. (2013). How can we  
395 bring together empiricists and modellers in functional biodiversity research? *Basic and*  
396 *Applied Ecology*, 14(2):93–101.
- 397 Jeschke, J. M. (2007). When carnivores are full and lazy. *Oecologia*, 152(2):357–364.
- 398 Jeschke, J. M., Kopp, M., and Tollrian, R. (2002). Predator functional responses: discrim-  
399 inating between handling and digesting prey. *Ecological Monographs*, 72(1):95–112.
- 400 Jeschke, J. M., Kopp, M., and Tollrian, R. (2004). Consumer-food systems: why type I  
401 functional responses are exclusive to filter feeders. *Biological Reviews*, 79(2):337–349.
- 402 Jeschke, J. M., Kopp, M., and Tollrian, R. (2006). Time and energy constraints: reply  
403 to Nolet and Klaassen (2005). *Oikos*, 114(3):553–554.
- 404 Jeschke, J. M. and Tollrian, R. (2005). Predicting Herbivore Feeding Times. *Ethology*,  
405 111(2):187–206.
- 406 Kalinkat, G. and Rall, B. C. (2015). Effects of climate change on the interactions between  
407 insect pests and their natural enemies. In Björkman, C. and Niemelä, P., editors,  
408 *Climate Change and Insect Pests*, pages 74–91. CABI, Wallingford, UK.

- 409 Kalinkat, G., Schneider, F. D., Digel, C., Guill, C., Rall, B. C., and Brose, U. (2013). Body  
410 masses, functional responses and predator-prey stability. *Ecology Letters*, 16(9):1126–  
411 1134.
- 412 Karasov, W. H. and McWilliams, S. R. (2005). Digestive constraints in mammalian  
413 and avian ecology. In Stark, J. M. and Wang, T., editors, *Physiological and ecological*  
414 *adaptations to feeding in vertebrates*, pages 88–112. Science Publishers, Enfield, New  
415 Hampshire.
- 416 Kleiber, M. (1961). *The Fire of Life: An Introduction to Animal Energetics*. Wiley, New  
417 York.
- 418 Li, Y., Brose, U., Meyer, K., and Rall, B. C. (2017). How patch size and refuge availability  
419 change interaction strength and population dynamics: a combined individual- and  
420 population-based modeling experiment. *PeerJ*, 5:e2993.
- 421 Maselou, D., Perdikis, D., and Fantinou, A. (2015). Effect of hunger level on prey con-  
422 sumption and functional response of the predator *Macrolophus pygmaeus*. *Bulletin of*  
423 *Insectology*, 68(2):211–218.
- 424 May, R. M. (1972). Will a large complex system be stable? *Nature*, 238(5364):413–414.
- 425 Mols, C. M. M., Oers, K. v., Witjes, L. M. A., Lessells, C. M., Drent, P. J., and Visser,  
426 M. E. (2004). Central assumptions of predator-prey models fail in a semi-natural  
427 experimental system. *Proceedings of the Royal Society of London B: Biological Sciences*,  
428 271(Suppl 3):S85–S87.
- 429 Oaten, A. and Murdoch, W. W. (1975). Functional response and stability in predator-  
430 prey systems. *The American Naturalist*, 109(967):289–298.

- 431 Oksanen, L., Fretwell, S. D., Arruda, J., and Niemela, P. (1981). Exploitation ecosystems  
432 in gradients of primary productivity. *The American Naturalist*, 118(2):240–261.
- 433 Pawar, S., Dell, A. I., and Savage, V. M. (2012). Dimensionality of consumer search space  
434 drives trophic interaction strengths. *Nature*, 486(7404):485–489.
- 435 Pinheiro, J., Bates, D., DebRoy, S., Sarkar, D., and R Core Team (2016). *nlme: Linear*  
436 *and Nonlinear Mixed Effects Models*. R package version 3.1-128.
- 437 R Core Team (2016). *R: A Language and Environment for Statistical Computing*. R  
438 Foundation for Statistical Computing, Vienna, Austria.
- 439 Raftery, A. E. (1995). Bayesian Model Selection in Social Research. *Sociological Method-*  
440 *ology*, 25:111–163.
- 441 Rall, B. C., Brose, U., Hartvig, M., Kalinkat, G., Schwarzmuller, F., Vucic-Pestic, O., and  
442 Petchey, O. L. (2012). Universal temperature and body-mass scaling of feeding rates.  
443 *Philosophical Transactions of the Royal Society B: Biological Sciences*, 367(1605):2923–  
444 2934.
- 445 Rall, B. C., Guill, C., and Brose, U. (2008). Food-web connectance and predator inter-  
446 ference dampen the paradox of enrichment. *Oikos*, 117(2):202–213.
- 447 Rall, B. C., Vucic-Pestic, O., Ehnes, R. B., Emmerson, M., and Brose, U. (2010). Tem-  
448 perature, predator-prey interaction strength and population stability. *Global Change*  
449 *Biology*, 16(8):2145–2157.
- 450 Rip, J. M. K. and McCann, K. S. (2011). Cross-ecosystem differences in stability and  
451 the principle of energy flux: Cross-ecosystem differences in stability. *Ecology Letters*,  
452 14(8):733–740.

- 453 Schröder, A., Kalinkat, G., and Arlinghaus, R. (2016). Individual variation in func-  
454 tional response parameters is explained by body size but not by behavioural types in  
455 a poeciliid fish. *Oecologia*, 182(4):1129–1140.
- 456 Sentis, A., Hemptinne, J.-L., and Brodeur, J. (2013). Parsing handling time into its  
457 components: implications for responses to a temperature gradient. *Ecology*, 94(8):1675–  
458 1680.
- 459 Solomon, M. E. (1949). The natural control of animal populations. *Journal of Animal*  
460 *Ecology*, 18:1–35.
- 461 Thompson, R. M., Brose, U., Dunne, J. A., Hall, R. O., Hladysz, S., Kitching, R. L.,  
462 Martinez, N. D., Rantala, H., Romanuk, T. N., Stouffer, D. B., and Tylianakis, J. M.  
463 (2012). Food webs: reconciling the structure and function of biodiversity. *Trends in*  
464 *Ecology & Evolution*, 27(12):689–697.
- 465 Tully, T., Cassey, P., and Ferriere, R. (2005). Functional response: rigorous estimation  
466 and sensitivity to genetic variation in prey. *Oikos*, 111(3):479–487.
- 467 Van Gils, J. A., Dekinga, A., Spaans, B., Vahl, W. K., and Piersma, T. (2005). Digestive  
468 bottleneck affects foraging decisions in red knots *Calidris canutus*. II. patch choice and  
469 length of working day. *Journal of Animal Ecology*, 74(1):120–130.
- 470 Zuur, A. F., Ieno, E. N., and Elphick, C. S. (2010). A protocol for data exploration  
471 to avoid common statistical problems: Data exploration. *Methods in Ecology and*  
472 *Evolution*, 1(1):3–14.
- 473 Zuur, A. F., Ieno, E. N., Walker, N., Saveliev, A. A., and Smith, G. M. (2009). *Mixed*  
474 *Effects Models and Extensions in Ecology with R*. Statistics for Biology and Health.  
475 Springer New York, New York, NY.



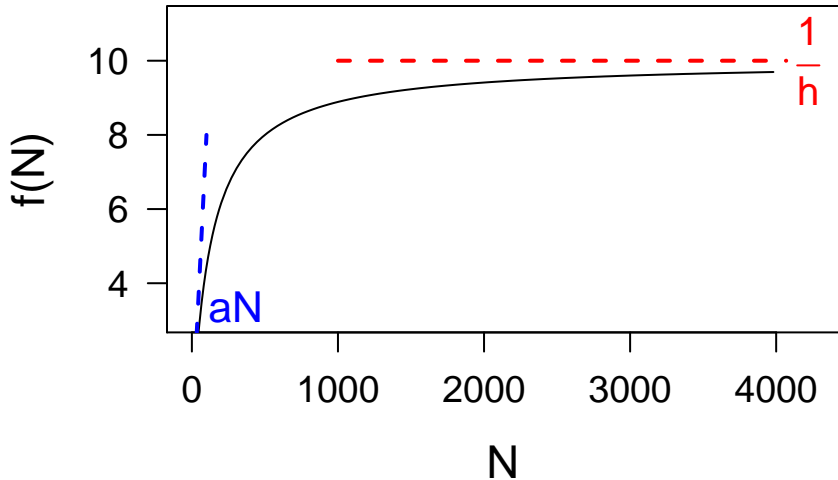

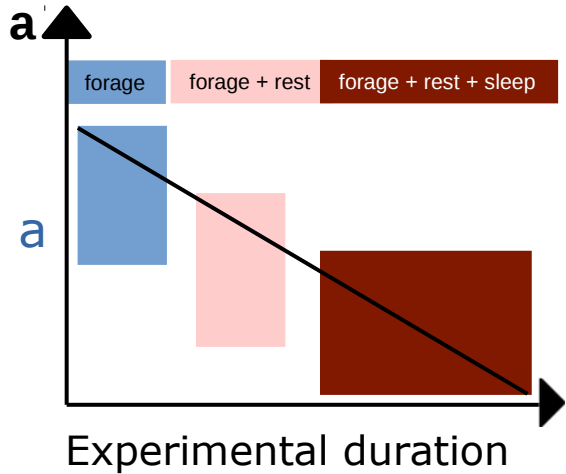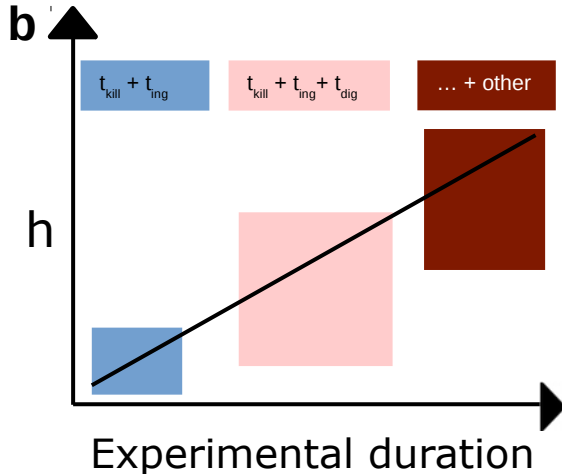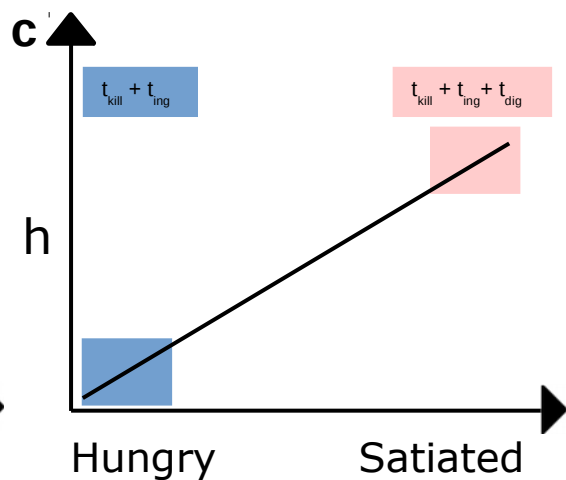

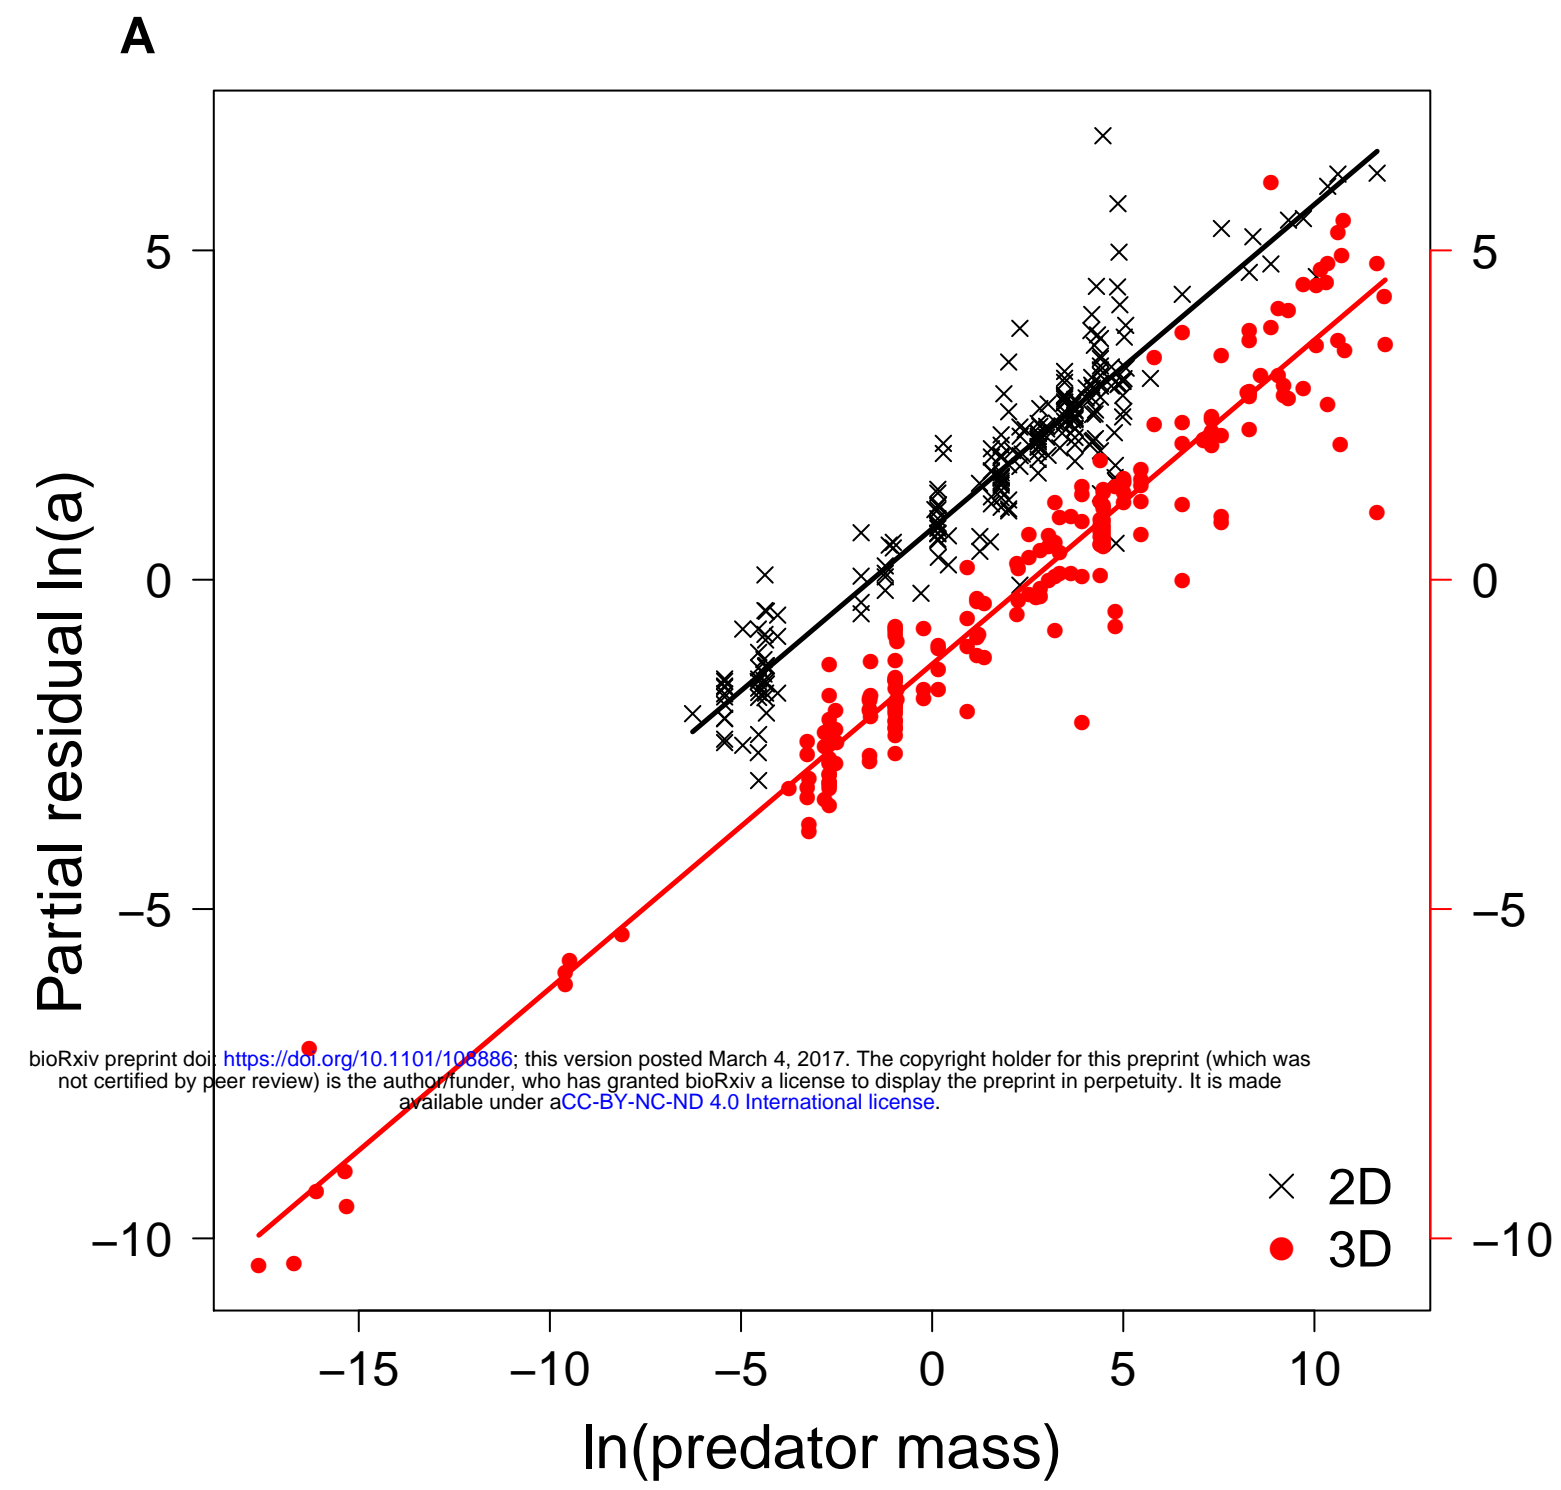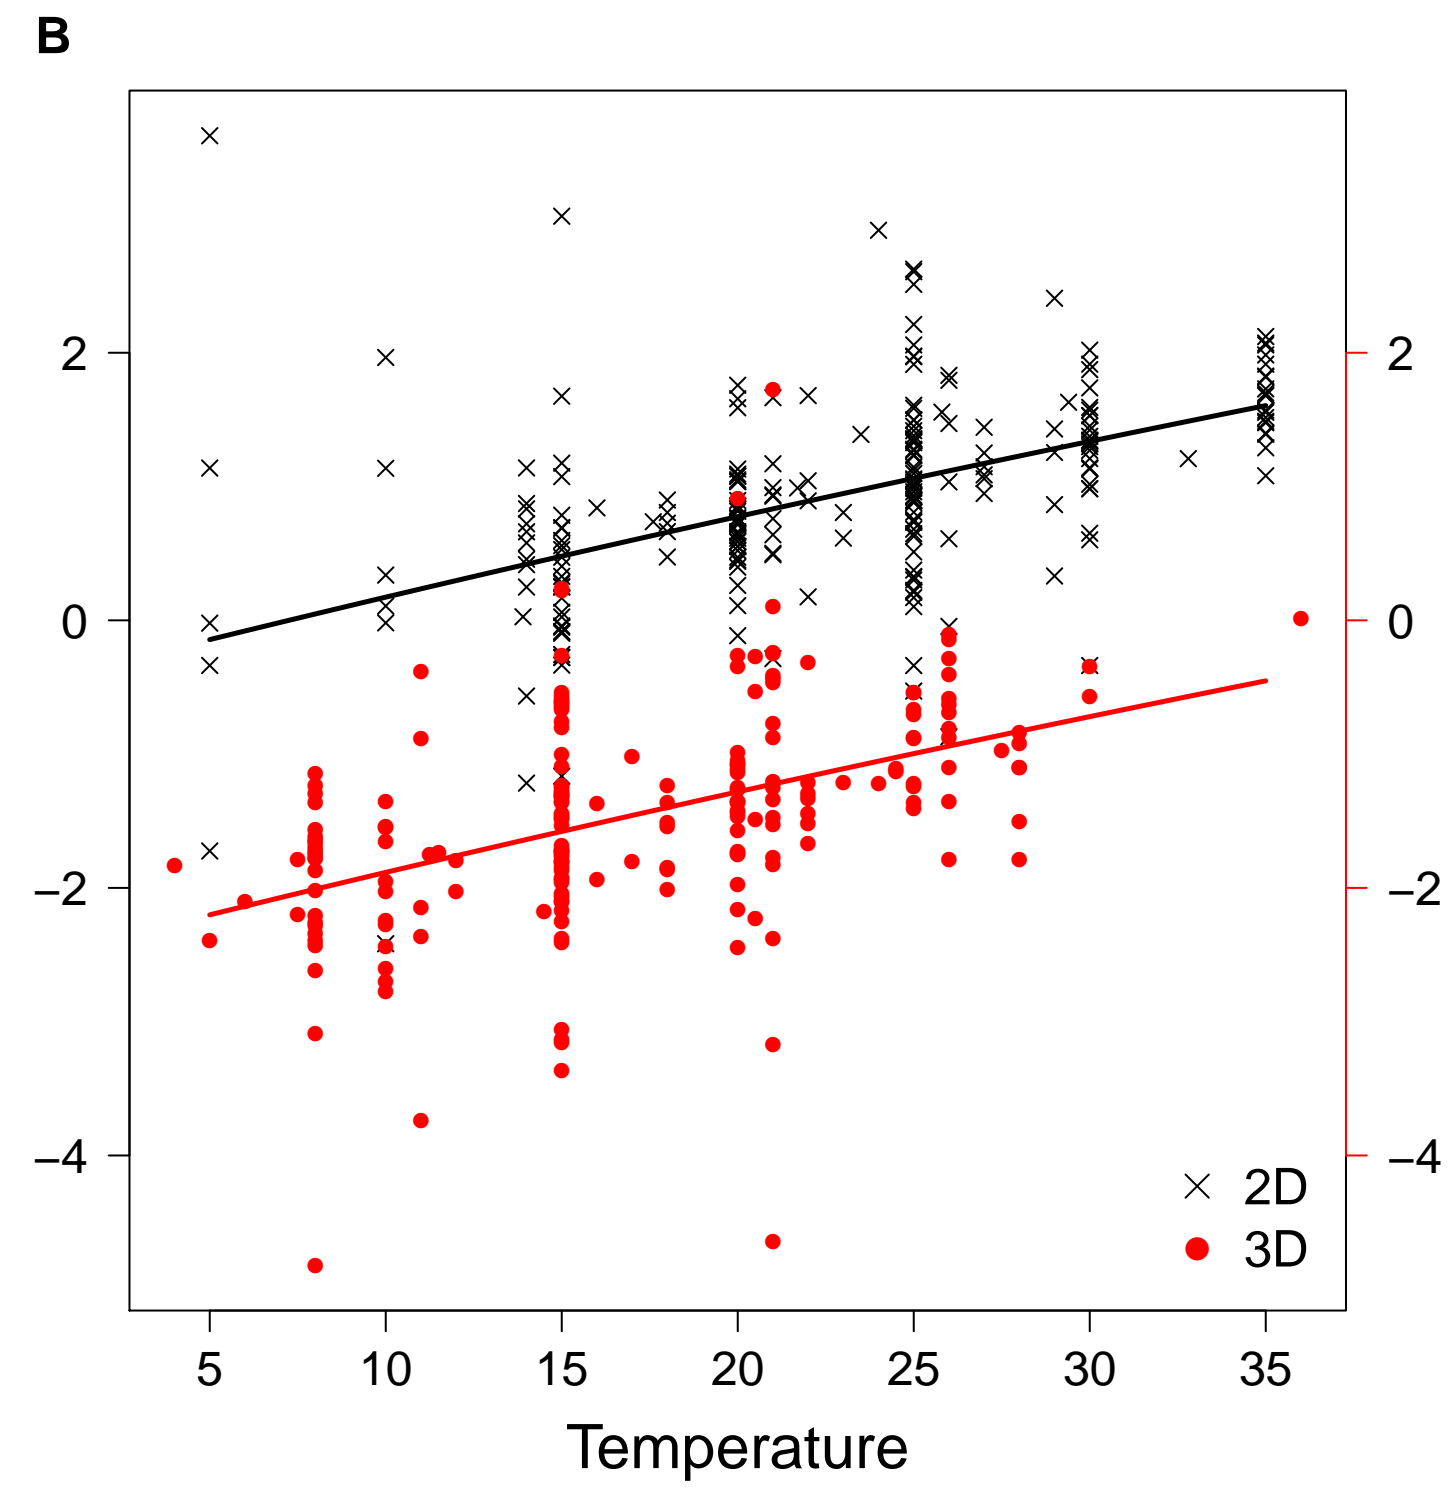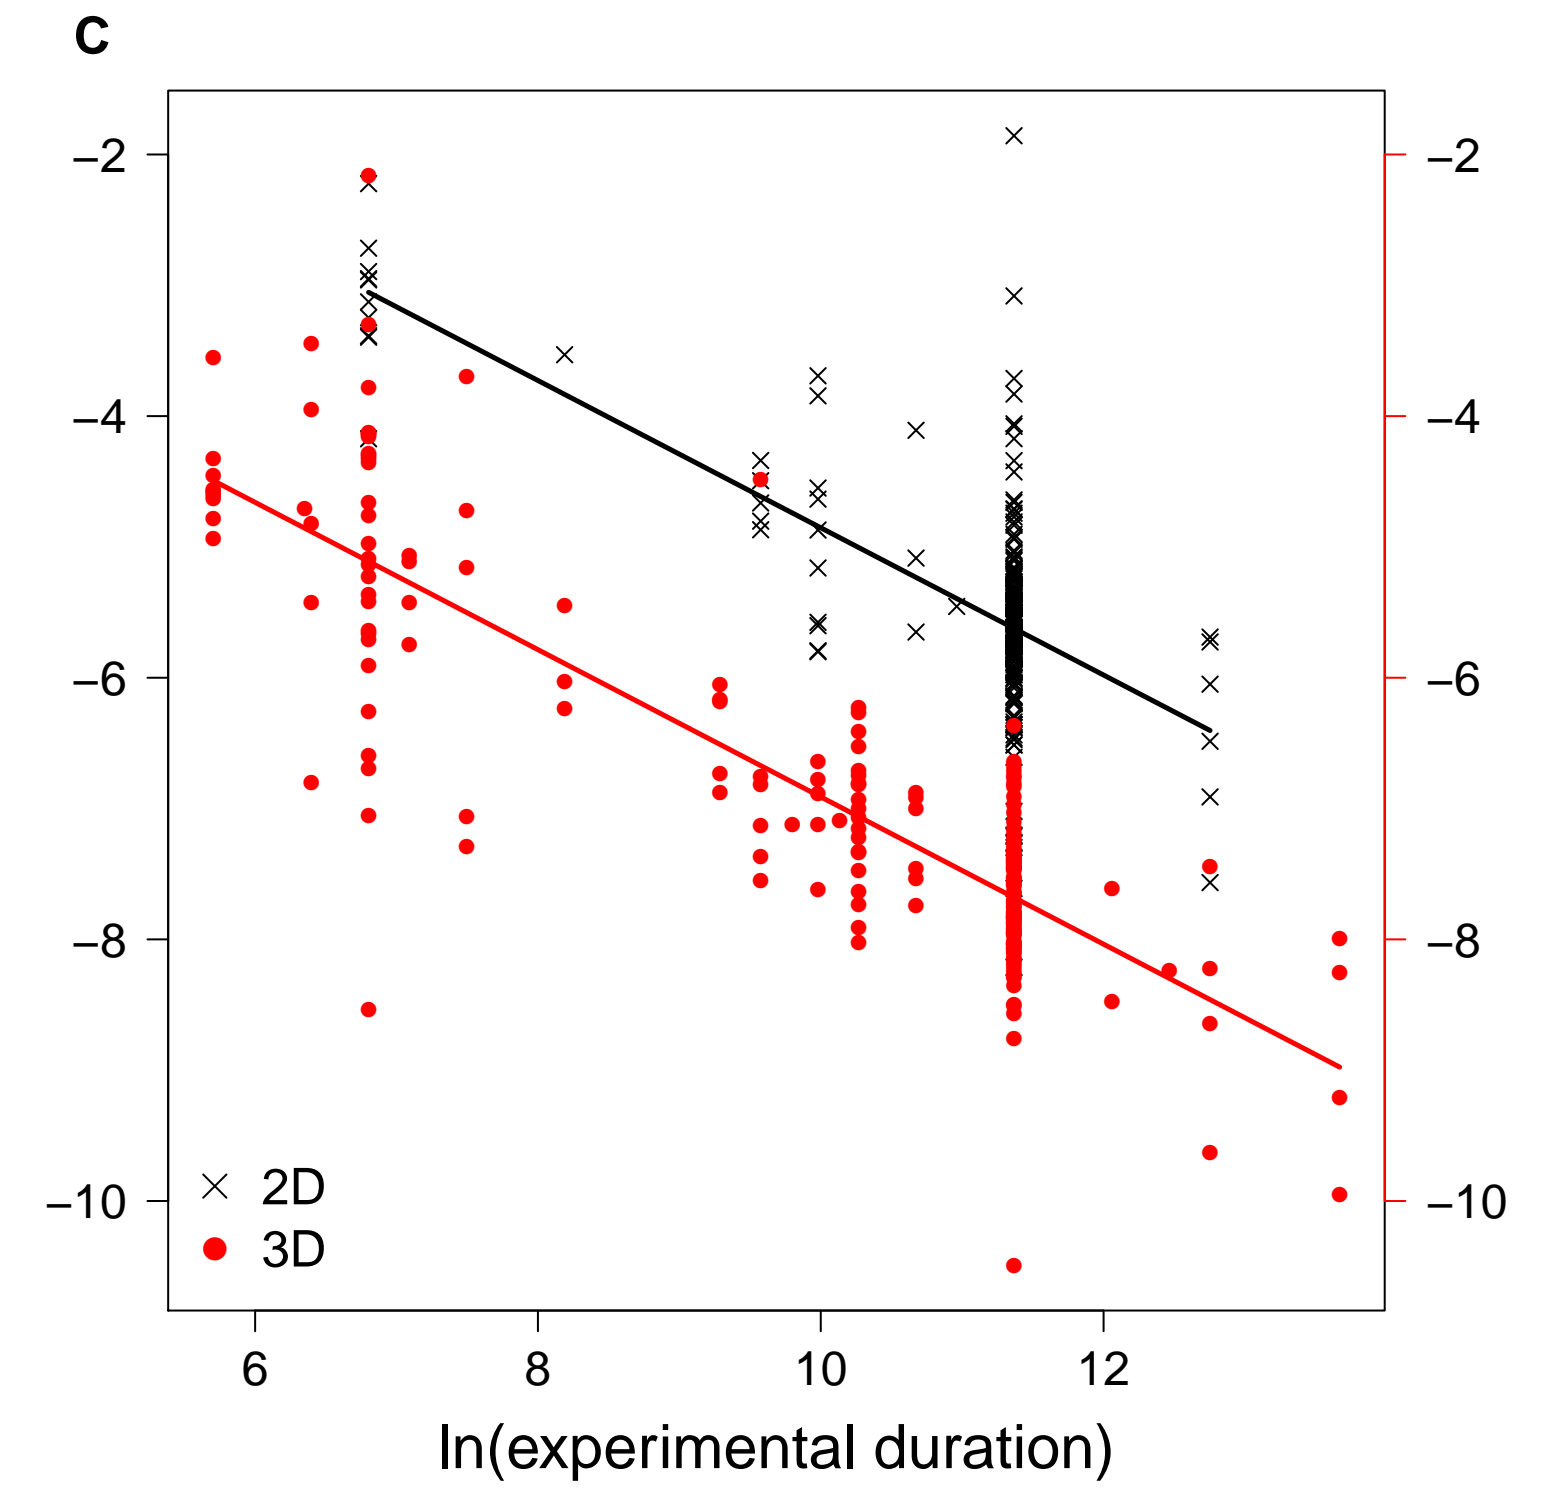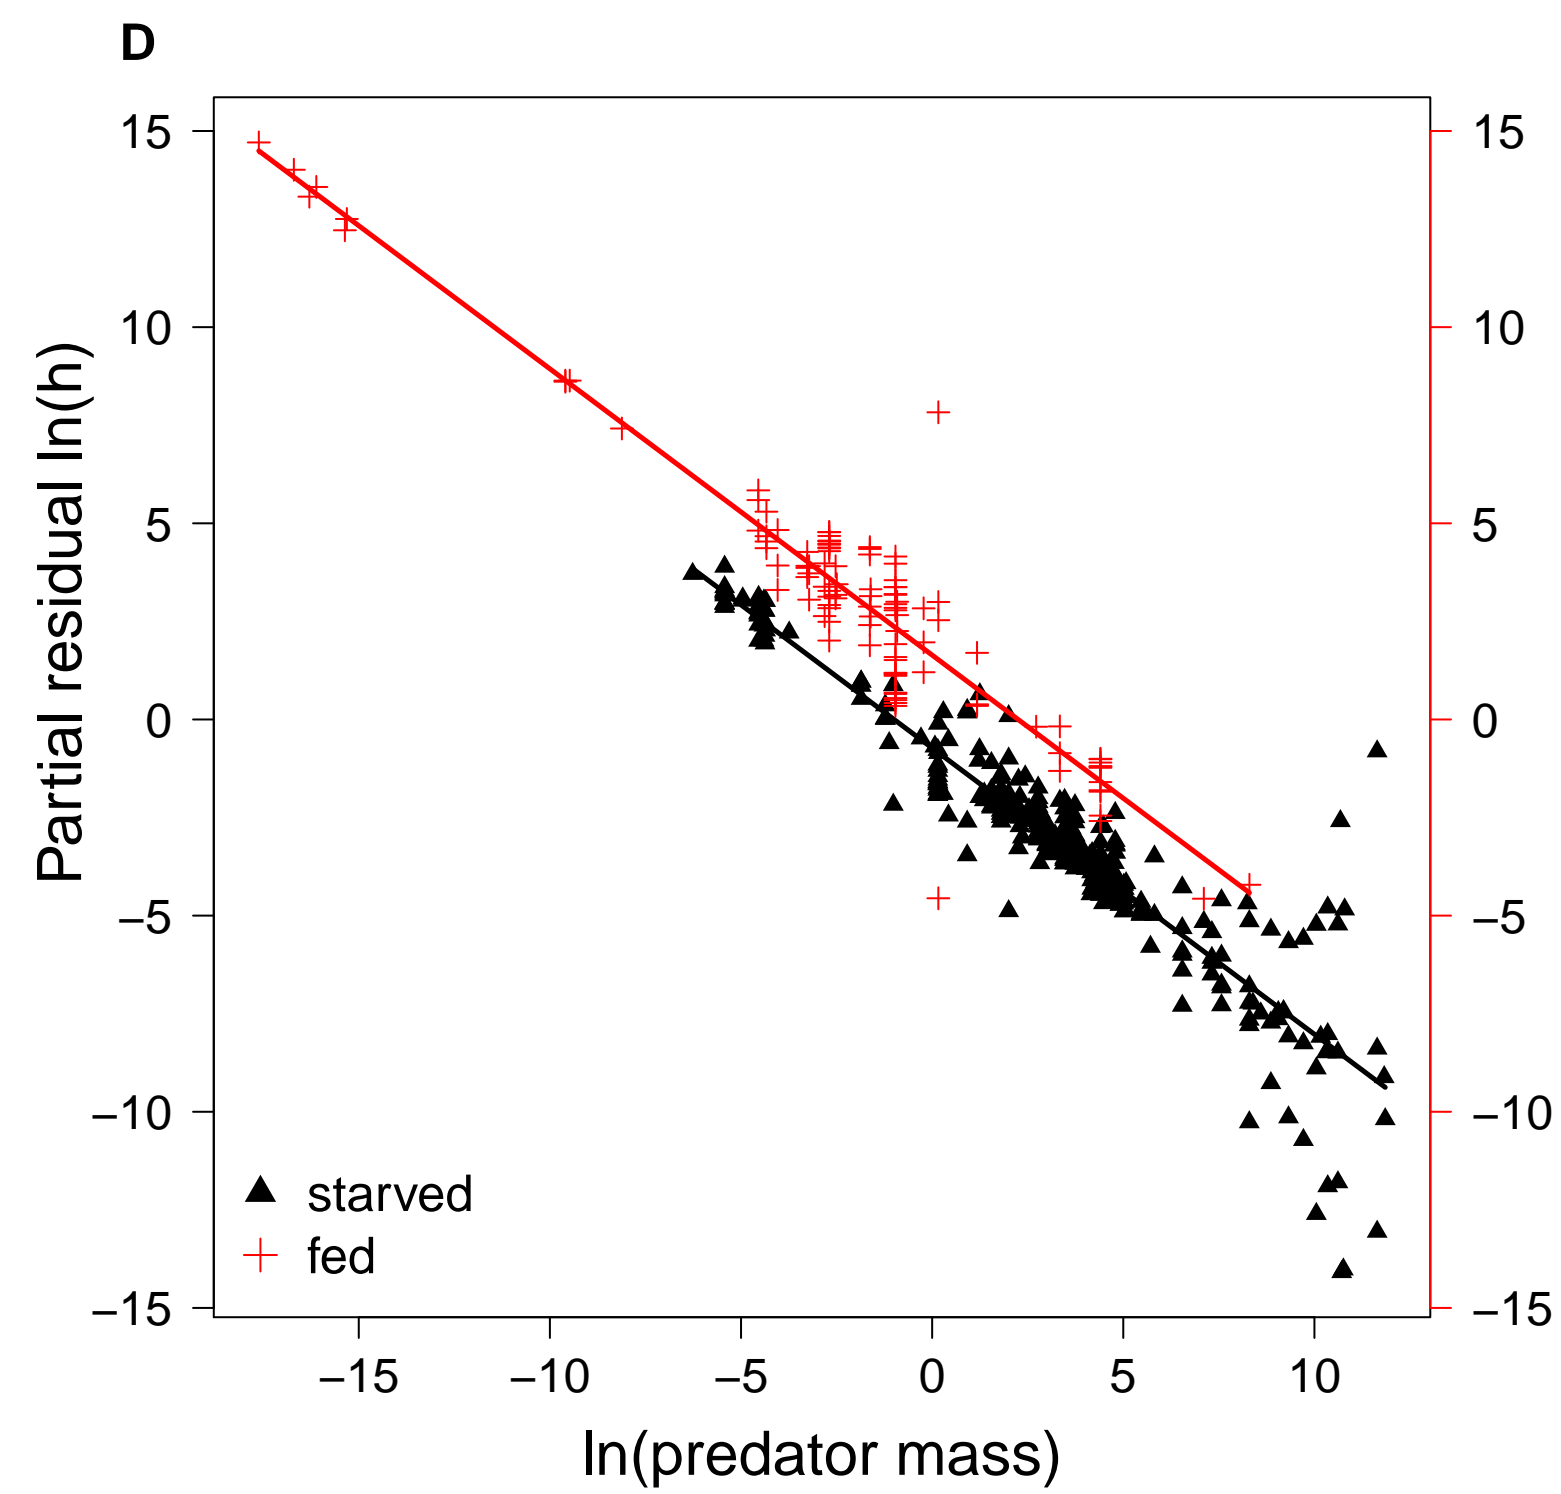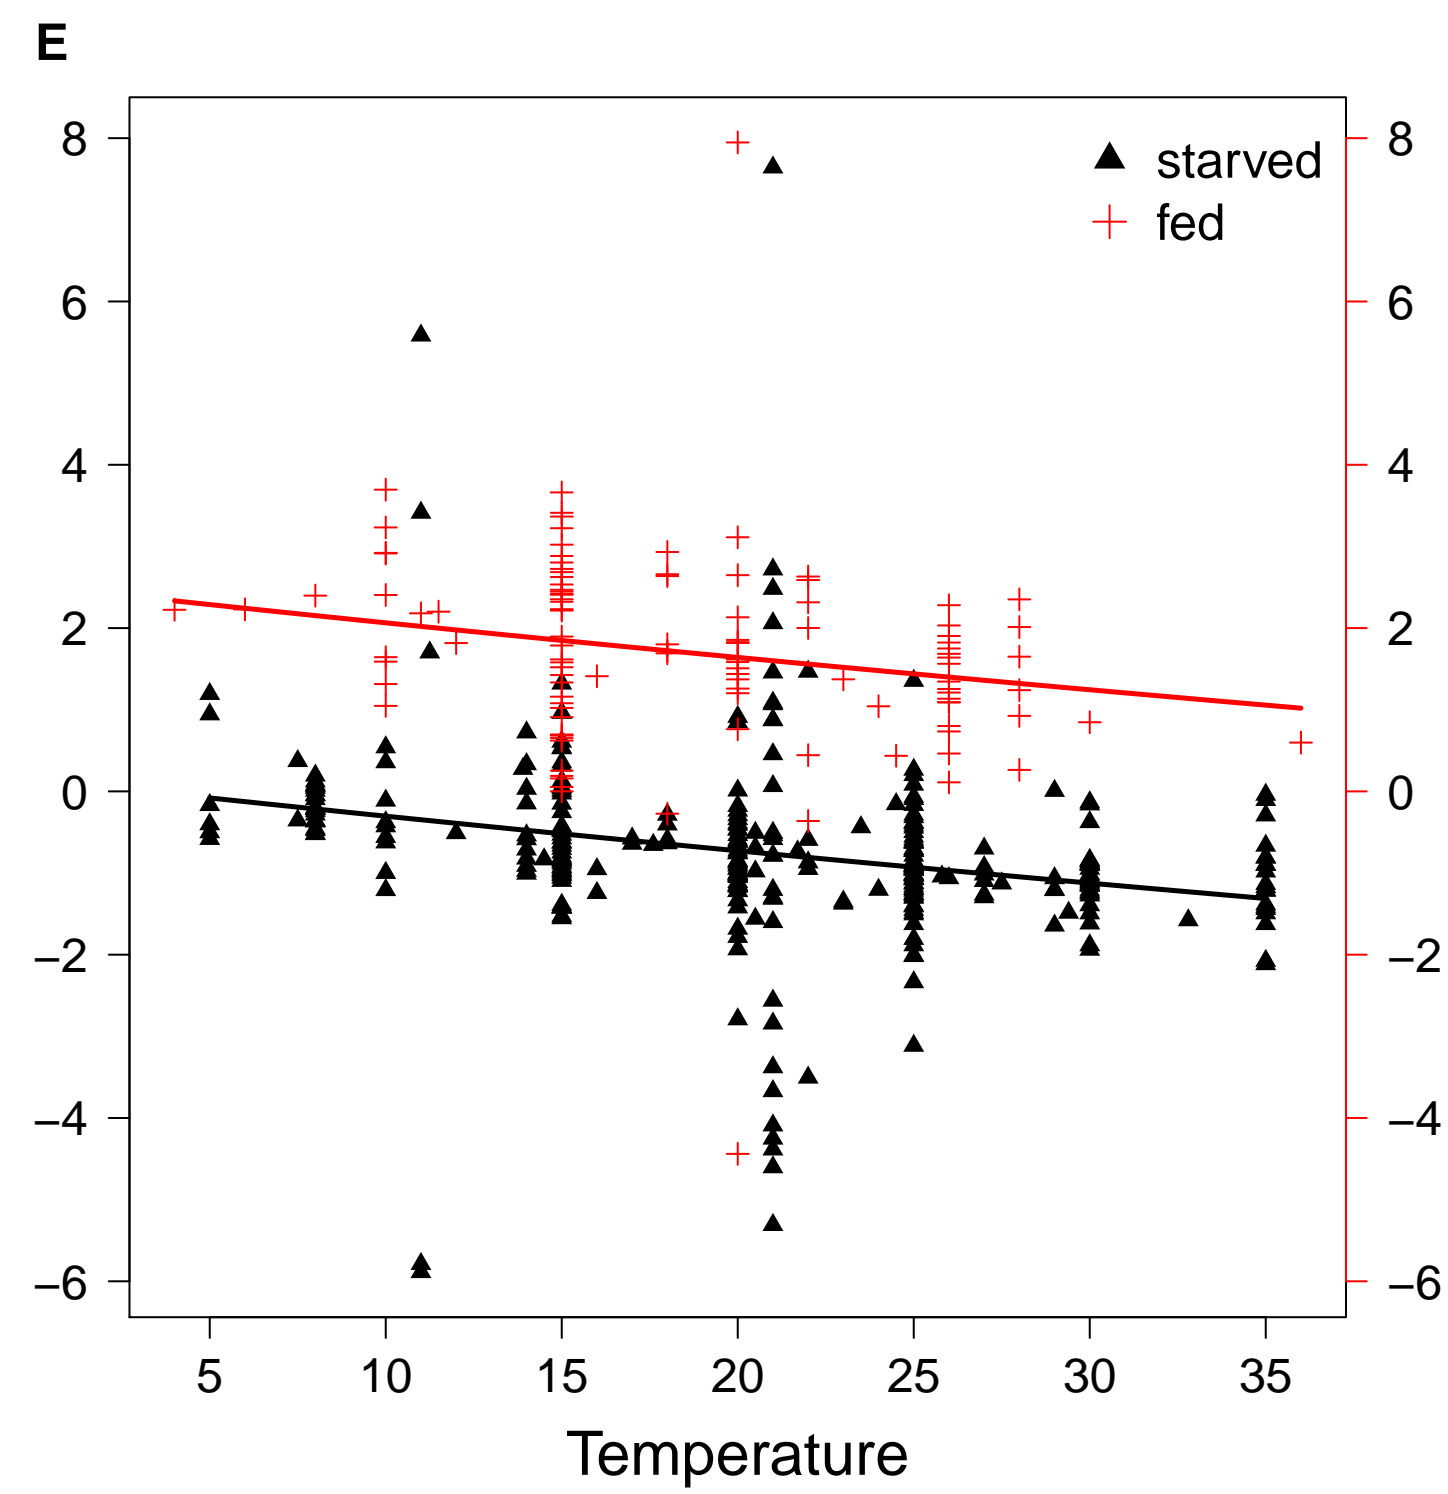

Source: http://www.biorxiv.org/content/10.1101/108886v1.full.pdf
